# Supplementary material
Source: MDPI journal article supplement (https://www.mdpi.com/2504-4990/5/1/13)
Supplement: s1 [file s1]

Figure S1. PRISMA 2020 flow diagram

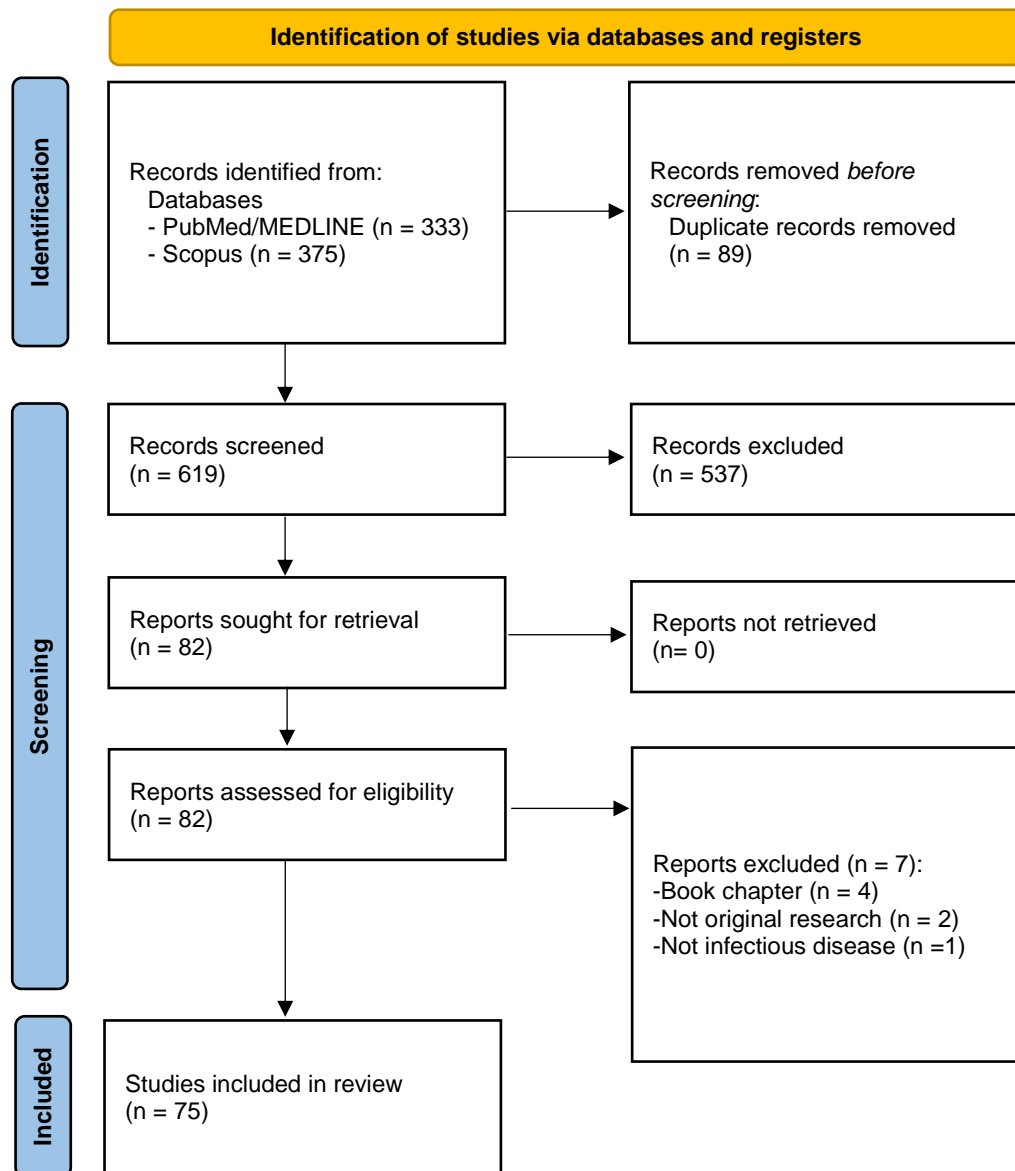

From: Page MJ, McKenzie JE, Bossuyt PM, Boutron I, Hoffmann TC, Mulrow CD, et al. The PRISMA 2020 statement: an updated guideline for reporting systematic reviews. BMJ 2021;372:n71. doi: 10.1136/bmj.n71.
