# Supplementary material
Source: MDPI journal article supplement (https://www.mdpi.com/2504-4990/5/1/13)
Supplement: s1 [file s1]

**Table S1.** Full search strategy

| Database       | Key words                                                                                                                                                                                                                                                                                                                                                                                                                                                                                                                                                                                                                                                                                                                                                                                                                                                                                                                                                                                                                                                                                                                                                                                                                                                                                                                                                                                                                                                                                                                                                    |
|----------------|--------------------------------------------------------------------------------------------------------------------------------------------------------------------------------------------------------------------------------------------------------------------------------------------------------------------------------------------------------------------------------------------------------------------------------------------------------------------------------------------------------------------------------------------------------------------------------------------------------------------------------------------------------------------------------------------------------------------------------------------------------------------------------------------------------------------------------------------------------------------------------------------------------------------------------------------------------------------------------------------------------------------------------------------------------------------------------------------------------------------------------------------------------------------------------------------------------------------------------------------------------------------------------------------------------------------------------------------------------------------------------------------------------------------------------------------------------------------------------------------------------------------------------------------------------------|
| PubMed/MEDLINE | ("influenza, human"[MeSH Terms] OR "Measles"[MeSH Terms] OR "Mumps"[MeSH Terms] OR "Rubella"[MeSH Terms] OR "herpesvirus 3, human"[MeSH Terms] OR "Chickenpox"[MeSH Terms] OR "Whooping Cough"[MeSH Terms] OR "Haemophilus influenzae"[MeSH Terms] OR "Haemophilus influenzae type b"[MeSH Terms] OR "Poliomyelitis"[MeSH Terms] OR "hepatitis, viral, human"[MeSH Terms] OR "Diphtheria"[MeSH Terms] OR "Tetanus"[MeSH Terms] OR "COVID-19"[MeSH Terms] OR "Neglected Diseases"[MeSH Terms] OR "Infections"[MeSH Terms] OR "infect*"[Title/Abstract] OR "infect*"[All Fields] OR "Communicable Diseases"[MeSH Terms] OR "influenza, human"[MeSH Terms] OR "influenza"[All Fields] OR "flu"[All Fields] OR "Arboviruses"[MeSH Terms] OR "Measles"[All Fields] OR "Mumps"[All Fields] OR "Rubella"[All Fields] OR "herpesvirus 3 human"[All Fields] OR "Chickenpox"[All Fields] OR "Whooping Cough"[All Fields] OR "Haemophilus influenzae"[All Fields] OR "Haemophilus influenzae type b"[All Fields] OR "Poliomyelitis"[All Fields] OR "hepatitis viral human"[All Fields] OR "Diphtheria"[All Fields] OR "Tetanus"[All Fields] OR "COVID-19"[All Fields] OR "Neglected Diseases"[All Fields] OR ("Whooping Cough"[MeSH Terms] OR ("whooping"[All Fields] AND "cough"[All Fields]) OR "Whooping Cough"[All Fields] OR "pertussis"[All Fields])) AND ("prediction" OR "forecasting") AND ("communicable disease*" OR "infectious diseases" OR "vaccines preventable diseases") AND "machine learning" NOT review* NOT systematic review NOT narrative review |
| Scopus         | ( ( human AND influenza ) OR ( measles ) OR ( mumps ) OR ( rubella ) OR ( herpesvirus ) OR TITLE-ABS-KEY ( chickenpox ) OR TITLE-ABS-KEY ( pertussis ) OR TITLE-ABS-KEY ( haemophilus AND influenzae ) OR TITLE-ABS-KEY ( poliomyelitis ) OR TITLE-ABS-KEY ( diphtheria ) OR TITLE-ABS-KEY ( tetanus ) OR TITLE-ABS-KEY ( covid-19 ) OR TITLE-ABS-KEY ( neglected AND disease ) OR TITLE-ABS-KEY ( infection ) AND TITLE-ABS-KEY ( forecasting ) OR TITLE-ABS-KEY ( prediction ) AND TITLE-ABS-KEY ( communicable AND diseases ) OR TITLE-ABS-KEY ( infectious AND diseases ) AND TITLE-ABS-KEY ( machine AND learning )                                                                                                                                                                                                                                                                                                                                                                                                                                                                                                                                                                                                                                                                                                                                                                                                                                                                                                                                     |

|  |                                                                                                                                   |
|--|-----------------------------------------------------------------------------------------------------------------------------------|
|  | AND NOT TITLE-ABS-KEY ( review ) AND NOT TITLE-ABS-KEY ( systematic AND review ) AND NOT TITLE-ABS-KEY ( narrative AND review ) ) |
|--|-----------------------------------------------------------------------------------------------------------------------------------|

Note: the search strings are different in relation to the usability of the database

**Table S2.** Detailed description of inclusion/exclusion criteria, based on PICOS (Population, Intervention, Comparison, Outcomes and Study design)

| Search strategy           | Details                                                                                                                                                                                                                                                                                     |
|---------------------------|---------------------------------------------------------------------------------------------------------------------------------------------------------------------------------------------------------------------------------------------------------------------------------------------|
| <i>Inclusion criteria</i> | P: human<br>I: machine learning<br>C: infectious diseases<br>O: prediction/forecasting outbreaks infectious diseases<br>S: primary observational studies (cohort, case-control, cross-sectional)                                                                                            |
| <i>Exclusion criteria</i> | P: not human<br>I: not about machine learning<br>C: not about infectious diseases<br>O: not about prediction/forecasting outbreaks infectious diseases<br>S: review article, meta-analysis, trial, expert opinion, commentary, editorial, case report, letter to the editor, book chapters. |
| <i>Language filter</i>    | English                                                                                                                                                                                                                                                                                     |
| <i>Time filter</i>        | No filter (from inception)                                                                                                                                                                                                                                                                  |
| <i>Database</i>           | PubMed/Medline; Scopus                                                                                                                                                                                                                                                                      |

**Table S3.** Quality assessment of the included studies, using the Newcastle-Ottawa Scale (NOS). In the lines in gray the proceedings/conference papers.

| Author, year, [Ref] | Selection | Comparability | Outcome |
|---------------------|-----------|---------------|---------|
| Absar N, 2022,[20]  | **        | **            | **      |
| Adiga A, 2021,[21]  | ****      | **            | ***     |
| Ahmad HF, 2021,[22] | ****      | *             | ***     |

|                                |      |    |     |
|--------------------------------|------|----|-----|
| Ak Ç, 2020,[23]                | **** | ** | *** |
| Ak Ç, 2018,[24]                | **   | ** | *** |
| Alsmadi MK, 2022,[25]          | **** | ** | *** |
| Ardabili SF, 2020,[26]         | **** | ** | **  |
| Asfahan S, 2020,[27]           | **   | ** | *** |
| Bagheri H, 2020,[28]           | ***  | ** | *** |
| Balogh A, 2022,[29]            | **** | *  | *** |
| Benedum CM, 2020,[30]          | **   | ** | *** |
| Chaurasia V, 2022,[31]         | **** | *  | *** |
| Chen J, 2018,[32]              | **   | ** | *** |
| Chimmula VKR, 2020,[33]        | **** | ** | **  |
| Dash S, 2021,[34]              | **** | *  | *** |
| Dixon S, 2022,[35]             | **** | ** | *** |
| González-Bandala DA, 2020,[36] | **** | ** | *** |
| Goo T, 2021,[37]               | **** | ** | *** |
| Guo Y, 2020,[38]               | **** | *  | **  |
| Haq I, 2022,[39]               | **   | ** | *** |
| Kamana E, 2022,[40]            | **** | ** | *** |

|                              |      |    |     |
|------------------------------|------|----|-----|
| Katragadda S, 2022,[41]      | **   | ** | *** |
| Ketu S, 2021,[42]            | **** | ** | **  |
| Kim J, 2021,[43]             | ***  | *  | *** |
| Kim J, 2019,[44]             | **   | ** | *** |
| Kumar SL, 2021,[45]          | **** | ** | **  |
| Lmater MA, 2021,[46]         | **** | ** | *** |
| Lu FS, 2018,[47]             | **** | ** | *** |
| Marra AR, 2020,[48]          | ***  | ** | **  |
| Meng D, 2021,[49]            | **** | ** | *** |
| Mohammad Masum AK, 2020,[50] | ***  | ** | *** |
| Murphy C, 2021,[51]          | **** | *  | *** |
| Nguyen VH, 2022,[52]         | **** | ** | *** |
| Niraula P, 2022,[53]         | **** | ** | *** |
| Nsoesie EO, 2021,[54]        | **** | ** | *** |
| Patil S, 2021,[55]           | **** | ** | *** |
| Pourghasemi HR, 2020,[56]    | **** | *  | *** |
| Roster K, 2022,[57]          | **** | ** | *** |
| Saba T, 2021,[58]            | **** | ** | *** |

|                            |      |    |     |
|----------------------------|------|----|-----|
| Shaghghi N, 2021,[59]      | **** | ** | *** |
| Shen C, 2021,[60]          | **** | ** | **  |
| Shen L, 2022,[61]          | **** | ** | *** |
| Shi Y, 2016,[62]           | **** | ** | *** |
| Tiwari D, 2022,[63]        | ***  | ** | *** |
| Venkatramanan S, 2021,[64] | **** | ** | *** |
| Verma H, 2022,[65]         | **** | ** | **  |
| Wang H, 2022,[66]          | **** | ** | *** |
| Wang X, 2022,[67]          | ***  | ** | *** |
| Wang Y, 2022,[68]          | **** | *  | *** |
| Xu J, 2020,[69]            | **** | ** | *** |
| Xu Q, 2017,[70]            | **** | ** | **  |
| Yang Z, 2020,[71]          | **** | ** | *** |
| Zhang Y, 2022,[72]         | **** | *  | **  |
| Zhong R, 2018,[73]         | ***  | ** | *** |
| Ajith A, 2020, [74]        | **   | ** | **  |
| Andreas A, 2020, [75]      | **   | ** | **  |
| Brock PM, 2019, [76]       | **   | ** | **  |

|                           |     |    |    |
|---------------------------|-----|----|----|
| Chumachenko D, 2021, [77] | *** | ** | ** |
| Chumachenko D, 2021, [78] | *** | ** | ** |
| Fan XR, 2022, [79]        | **  | ** | ** |
| Hasri H, 2021, [80]       | *+  | ** | ** |
| Kolesnikov AA, 2019, [81] | **  | ** | ** |
| Kumari P, 2020, [82]      | **  | ** | ** |
| Liu Z, 2021, [83]         | **  | ** | ** |
| Maaliw RR, 2021, [84]     | *** | ** | ** |
| Mahima Y, 2020, [85]      | **  | ** | ** |
| Mei W, 2021, [86]         | *** | *  | ** |
| Patayon UB, 2021 [87]     | **  | ** | ** |
| Pickering L, 2020, [88]   | **  | ** | ** |
| Rohini M, 2021, [89]      | *** | ** | ** |
| Satu MS,2021, [90]        | **  | ** | ** |
| Sri SB, 2022, [91]        | **  | ** | ** |
| Wang H, 2022, [92]        | **  | ** | ** |
| Zhou Q, 2020, [93]        | **  | ** | ** |
| Zhang P,2022, [94]        | *** | ** | ** |

\* Each star represents a high-quality  
criterion accomplished by the study

**MAX \*\*\*\***

**MAX \*\***

**MAX \*\*\***
